# Supplementary material for: From reverse worms to reverse vesicles formed by mixed zwitterionic and non-ionic surfactants in cyclohexane
Source: Royal Society of Chemistry journal article supplement (doi:10.1039/c5ra27360a), 2016-01-01
Supplement: c5ra27360a1.pdf [file c5ra27360a1.pdf]

## Supporting Information

### From reverse worms to reverse vesicles formed by mixed zwitterionic and non-ionic surfactants in cyclohexane

Ge Yang, Jianxi Zhao\*

Institute of Colloid and Interface Chemistry, College of Chemistry and Chemical Engineering,  
Fuzhou University, Fuzhou, Fujian, 350108, China

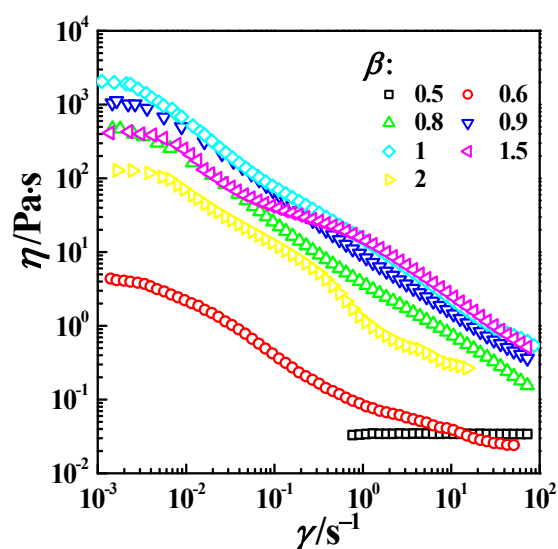

**Fig.S1** Steady-state viscosity curves for mixed SB-12/C<sub>12</sub>E<sub>4</sub> in cyclohexane at a SB-12 concentration of 300 mmol/L and at  $W_0=4.5$  but different  $\beta$  (the molar ratio of C<sub>12</sub>E<sub>4</sub> to SB-12).

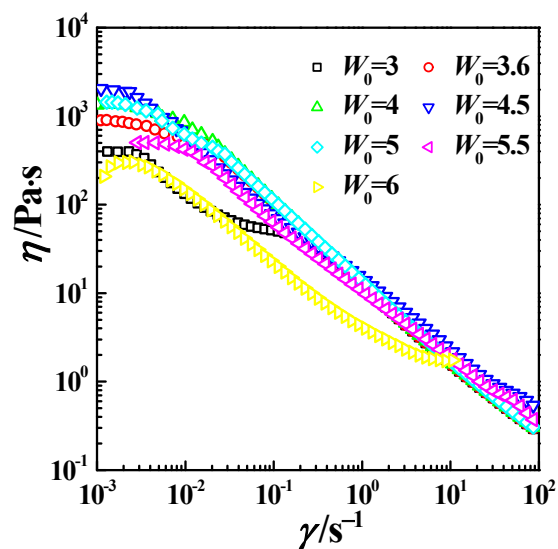

**Fig.S2** Steady-state viscosity curves for the equal-molar mixture of SB-12 (300 mmol/L)/C<sub>12</sub>E<sub>4</sub> in

cyclohexane at different  $W_0$ .

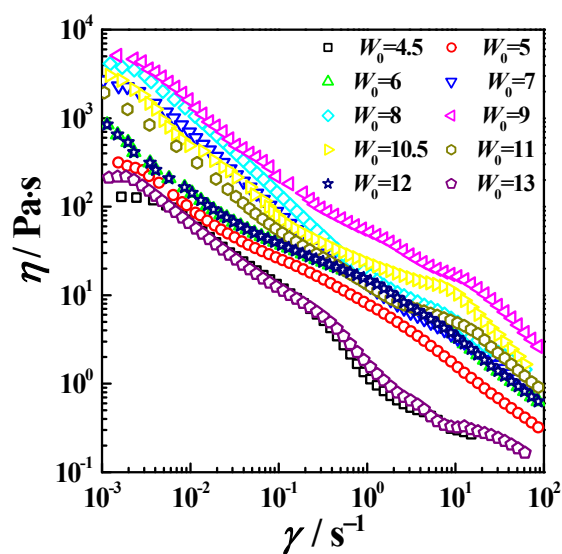

**Fig.S3** Steady-state viscosity curves for SB-12(300 mmol/L)/C<sub>12</sub>E<sub>4</sub> in cyclohexane at  $\beta = 2$  and different  $W_0$ .

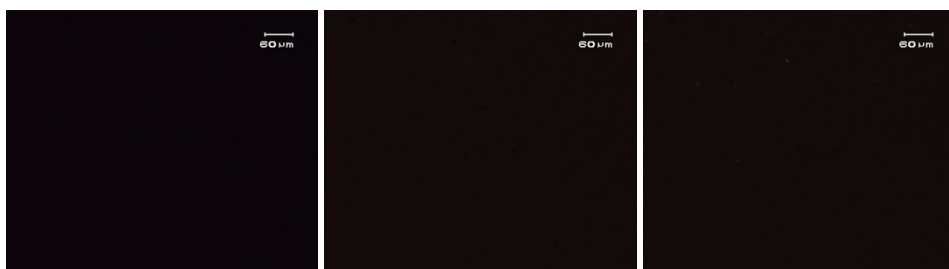

**Fig.S4** Polarized micrographs for the samples of SB-12(300 mmol/L)/C<sub>12</sub>E<sub>4</sub> at  $\beta = 1$  and  $W_0 = 3$ , 4.5, and 6, from left to right.

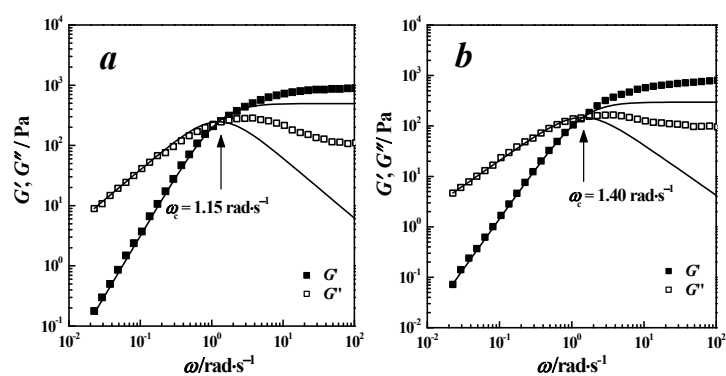

**Fig.S5** Dynamic viscoelastic spectra for the equal-molar mixtures of SB-12(300 mmol·L<sup>-1</sup>)/C<sub>12</sub>E<sub>4</sub>(300 mmol·L<sup>-1</sup>) at  $W_0 = 3$  (a) and 6 (b). The solid lines were the fitting results according to the Maxwell model.

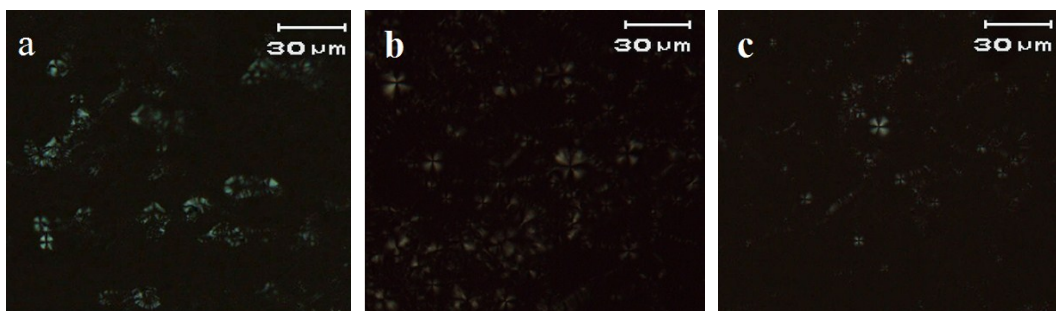

**Fig.S6** Polarized micrographs of the samples of SB-12(300 mmol/L)/C<sub>12</sub>E<sub>4</sub> system at  $\beta = 2$  and (a)  $W_0 = 4.5$ , (b)  $W_0 = 9$ , and (c)  $W_0 = 13$
